# Supplementary material
Source: Royal Society of Chemistry journal article supplement (doi:10.1039/d6nj01041e)
Supplement: d6nj01041e1.pdf [file d6nj01041e1.pdf]

## Supporting Information

### High-Efficiency CIGSSe Solar Cells Enabled by Solution-Processed ZnO, TiO<sub>2</sub>, and SnO<sub>2</sub> Nanoparticle Window Layers

Chunyi Li,<sup>a</sup> Dongdong Shen,<sup>a, b</sup> Bowen Liu,<sup>a, b</sup> Zhuoer Deng,<sup>a</sup> Yongliang Lai,<sup>a</sup> Xinan Shi<sup>a\*</sup> and Daocheng Pan<sup>a, b\*</sup>

<sup>a</sup>State Key Laboratory of Featured Metal Materials and Life-cycle Safety for Composite Structures; Guangxi Key Laboratory of Processing for Non-ferrous Metals and Featured Materials; Guangxi Key Laboratory of Advanced Rare Earth Materials; School of Resources, Environment and Materials, Guangxi University, Nanning 530004, China

<sup>b</sup>School of Chemistry and Chemical Engineering, Guangxi University, Nanning 530004, China

E-mail: xashi@gxu.edu.cn and dcpan@gxu.edu.cn

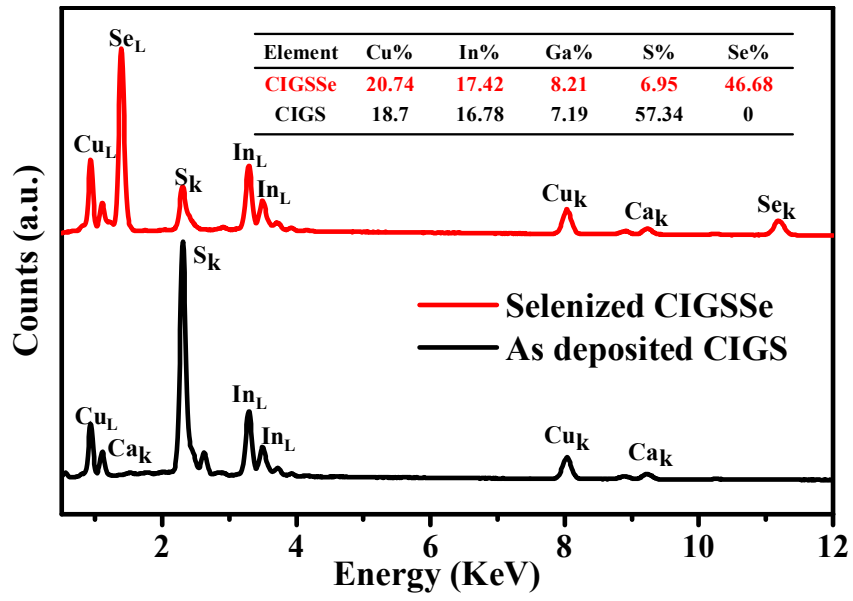

**Figure S1** EDS spectra of the as-deposited CIGS precursor film and the selenized CIGSSe thin film.

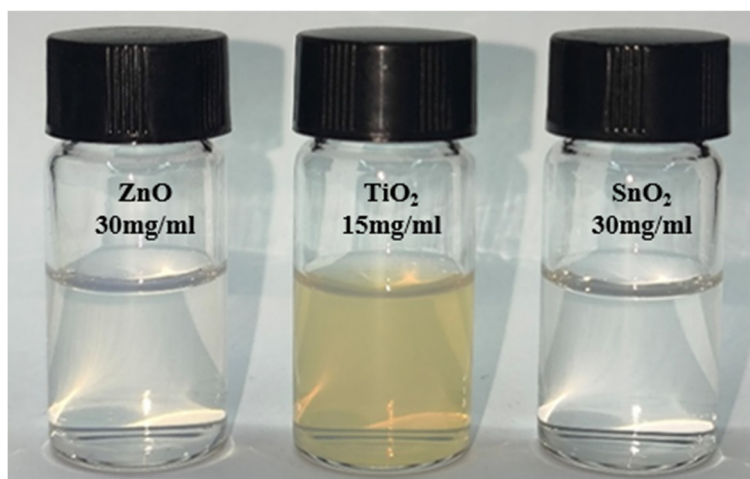

**Figure S2** Photograph of ZnO, TiO<sub>2</sub>, and SnO<sub>2</sub> nanoparticles dispersed in ethanol.

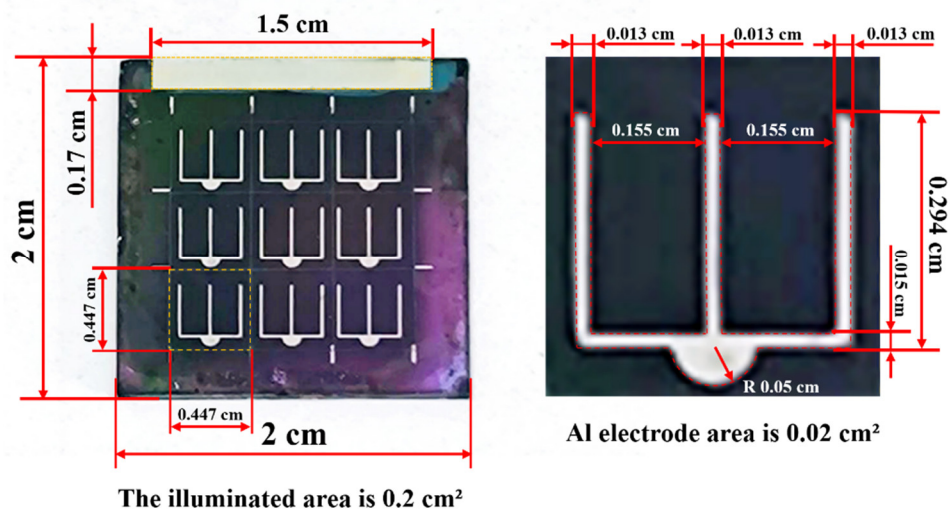

**Figure S3** Schematic diagram of a small-area CIGSSe thin-film solar cell.

**Table S1** Effects of selenization conditions on the performance of sputtered *i*-ZnO-based CIGSSe thin film solar cells.

| T (°C) | Time (min) | J <sub>SC</sub> (mA/cm <sup>2</sup> ) | V <sub>OC</sub> (V) | FF (%) | PCE (%) |
|--------|------------|---------------------------------------|---------------------|--------|---------|
| 520    | 15         | 30.77                                 | 0.49                | 43.53  | 6.58    |
| 530    | 15         | 28.46                                 | 0.54                | 56.72  | 8.6     |
| 540    | 15         | 23.29                                 | 0.52                | 43.58  | 5.32    |
| 550    | 15         | 23.75                                 | 0.39                | 30.00  | 2.76    |
| 530    | 10         | 25.56                                 | 0.52                | 49.71  | 6.56    |
| 530    | 15         | 28.46                                 | 0.54                | 56.72  | 8.73    |
| 530    | 20         | 28.27                                 | 0.54                | 42.41  | 6.44    |
| 530    | 25         | 26.52                                 | 0.46                | 35.57  | 4.38    |

**Table S2** Influences of annealing temperature of metal oxide nanoparticles on the performance of CIGSSe solar cell devices.

| Window layer     | T (°C) | Time (min) | J <sub>sc</sub> (mA/cm <sup>2</sup> ) | V <sub>oc</sub> (V) | FF (%) | PCE (%) |
|------------------|--------|------------|---------------------------------------|---------------------|--------|---------|
| ZnO              | 100    | 15         | 31.14                                 | 0.56                | 52.25  | 9.15    |
|                  | 115    | 15         | 32.34                                 | 0.56                | 56.16  | 10.22   |
|                  | 130    | 15         | 29.41                                 | 0.55                | 54.51  | 8.80    |
|                  | 145    | 15         | 28.01                                 | 0.37                | 31.52  | 3.26    |
| TiO <sub>2</sub> | 140    | 15         | 30.93                                 | 0.55                | 53.25  | 9.13    |
|                  | 150    | 15         | 31.47                                 | 0.56                | 58.60  | 10.25   |
|                  | 160    | 15         | 24.72                                 | 0.51                | 55.54  | 7.06    |
|                  | 170    | 15         | 20.20                                 | 0.55                | 43.24  | 4.78    |
| SnO <sub>2</sub> | 100    | 15         | 30.84                                 | 0.55                | 50.93  | 8.70    |
|                  | 115    | 15         | 33.16                                 | 0.59                | 56.86  | 11.08   |
|                  | 130    | 15         | 31.57                                 | 0.55                | 53.34  | 9.26    |
|                  | 145    | 15         | 27.30                                 | 0.57                | 43.96  | 6.89    |

**Table S3** Impacts of annealing time of metal oxide nanoparticles on the performance of CIGSSe solar cell devices.

| Window layer     | T (°C) | Time (min) | J <sub>sc</sub> (mA/cm <sup>2</sup> ) | V <sub>oc</sub> (V) | FF (%) | PCE (%) |
|------------------|--------|------------|---------------------------------------|---------------------|--------|---------|
| ZnO              | 115    | 10         | 34.07                                 | 0.54                | 50.86  | 9.43    |
|                  | 115    | 15         | 32.34                                 | 0.56                | 56.16  | 10.22   |
|                  | 115    | 20         | 27.31                                 | 0.57                | 46.61  | 7.31    |
|                  | 115    | 25         | 21.30                                 | 0.52                | 41.61  | 4.56    |
| TiO <sub>2</sub> | 150    | 10         | 30.42                                 | 0.56                | 53.95  | 9.22    |
|                  | 150    | 15         | 31.47                                 | 0.56                | 58.60  | 10.25   |
|                  | 150    | 20         | 25.69                                 | 0.56                | 59.73  | 8.58    |
|                  | 150    | 25         | 23.20                                 | 0.54                | 38.92  | 4.86    |
| SnO <sub>2</sub> | 115    | 10         | 30.71                                 | 0.57                | 56.58  | 9.89    |
|                  | 115    | 15         | 33.16                                 | 0.59                | 56.86  | 11.08   |
|                  | 115    | 20         | 29.49                                 | 0.55                | 54.11  | 8.79    |
|                  | 115    | 25         | 21.16                                 | 0.50                | 47.47  | 5.00    |

**Equation S1<sup>1,2</sup>**

$$E_U = \left( \frac{d(\ln EQE)}{d(h\nu)} \right)^{-1}$$

$h$  is the Planck constant, with a value of approximately  $4.136 \times 10^{-15}$  eV·s.

$\nu$  is the photon frequency, with the unit of Hz ( $s^{-1}$ ).

**Equation S2<sup>3</sup>**

$$W = \frac{K_s \epsilon_0 A}{C}$$

$K_s$ : dielectric constant of the semiconductor.

$\epsilon_0$ : vacuum permittivity,  $8.85419 \times 10^{-14}$  F/cm.

$A$ : cell area (cm<sup>2</sup>).

$C$ : measured junction capacitance (F).

### Equation S3<sup>4</sup>

$$N_{CV} = \frac{2}{qK_s\epsilon_0A^2\left[\frac{d(1/C^2)}{dV}\right]}$$

$C$ : measured junction capacitance (F).

$V$ : applied DC bias (V).

$q$ : electron charge,  $1.602\times 10^{-19}$  C.

$K_s$ : dielectric constant of the semiconductor.

$\epsilon_0$ : vacuum permittivity,  $8.85419\times 10^{-14}$  F/cm.

$A$ : cell area ( $\text{cm}^2$ ).

### Equation S4<sup>3</sup>

$$N_{DLCP} = \frac{C_0^3}{2qK_s\epsilon_0A^2C_1}$$

$V$ : applied DC bias (V).

$q$ : electron charge,  $1.602 \times 10^{-19}$  C.

$K_s$ : dielectric constant of the semiconductor.

$\epsilon_0$ : vacuum permittivity,  $8.85419 \times 10^{-14}$  F/cm.

$A$ : cell area (cm<sup>2</sup>).

$C_0$ : zero-order capacitance coefficient; junction capacitance at  $\delta V \rightarrow 0$ , equivalent to the conventional C-V capacitance.

$C_1$ : first-order capacitance coefficient; linear coefficient of capacitance change with respect to  $\delta V$ .

## References

- 1 C. Kaiser, O. J. Sandberg, N. Zarrabi, W. Li, P. Meredith and A. Armin, *Nat. Commun.*, 2021, **12**, 3988-3996.
- 2 E. Ugur, M. Ledinský, T. G. Allen, J. holovský, A. Vlk and S. D. Wolf, *J. Phys. Chem. Lett.*, 2022, **13**, 7702-7711.
- 3 J. T. Heath, J. D. Cohen, W. N. Shafarman. *J. Appl. Phys.*, 2004, **95**, 1000-1010.
- 4 A. Cho, S. J. Ahn, J. H. Yun, J. Gwak, H. Song and K. Yoon, *J. Mater. Chem.*, 2012, **22**, 17893-17899.
